# Supplementary material for: Impact of a decade of successful antiretroviral therapy initiated at HIV-1 seroconversion on blood and rectal reservoirs
Source: eLife journal article supplement (doi:10.7554/elife.09115), 2015-10-06
Supplement: supp [file elife-09115-supp-v1.zip]

1 **Supplementary Table:** Summary of primers/probe sets for PCR-based virological quantification.

| Assay                                       | Annealing temperature (°C) | Genomic region | Name    | Use in PCR | Sequence                                                           | Amplicon length (bp) | Reference                      |
|---------------------------------------------|----------------------------|----------------|---------|------------|--------------------------------------------------------------------|----------------------|--------------------------------|
| <b>Total HIV-1 DNA/ Nested Alu-HIV qPCR</b> | 58                         | <i>RU5</i>     | RU5 F   | Sense      | 5'-TTAAGCCTCAATAAAGCTTGCC-3'                                       |                      |                                |
|                                             |                            |                | RU5 R   | Antisense  | 5'- GTTCGGGCGCCACTGCTAGA-3'                                        |                      |                                |
|                                             |                            |                | RU5     | Probe      | 5'-/56-FAM/CCAGAGTCA/ZEN/CACAACAGACGGGCACA/3IABkFQ/-3'             | 130                  | (De Spiegelaere et al., 2014)  |
| <b>Alu-HIV PCR</b>                          | 60                         | <i>Alu</i>     | Alu F   | Sense      | GCCTCCCAAAGTGCTGGGATTACAG                                          |                      |                                |
|                                             |                            | <i>Gag</i>     | Gag R   | Antisense  | GTTCTGCTATGTCACTTCC                                                |                      | ( De Spiegelaere et al., 2014) |
| <b>2-LTR circles</b>                        | 60                         | 2-LTR junction | 2-LTR F | Sense      | 5'- CTAAGTGGGAACCCACTGCT-3'                                        |                      |                                |
|                                             |                            |                | 2-LTR R | Antisense  | 5'- GTAGTTCTGCCAATCAGGGAAG-3'                                      |                      |                                |
|                                             |                            |                | 2-LTR   | Probe      | 5'- /56-FAM/AGC CTC AAT /ZEN/AAA GCT TGC CTT GAG TGC /3IABkFQ/ -3' | 226                  | (Buzon et al., 2010)           |
| <b>HIV-1 usRNA</b>                          | 60                         | <i>Gag-Pol</i> | usRNA F | Sense      | CATGTTTTTCAGCATTATCAGAAGGA                                         | 100                  |                                |
|                                             |                            | <i>Gag</i>     | usRNA R | Antisense  | TGCTTGATGTCCCCCACT                                                 |                      |                                |
|                                             |                            | <i>Gag</i>     | usRNA   | Probe      | CCACCCCAAGATTAAACACCATGCTAA                                        |                      | (Kiselinova et al., 2014)      |
| <b>RPP30</b>                                | 60                         | <i>RPP30</i>   | RPP30 F | Sense      | 5'-AGATTTGGACCTGCGAGCG-3'                                          |                      |                                |
|                                             |                            |                | RPP30 R | Antisense  | 5'-GAGCGGCTGTCTCCACAAGT-3'                                         |                      |                                |
|                                             |                            |                | RPP30   | Probe      | 5'- /56-FAM/TTCTGACCT/ZEN/GAAGGCTCTGCGCG/3IABkFQ/ -3'              | 64                   |                                |
| <b>pSIF</b>                                 | 60                         | <i>WPRE</i>    | WPRE F  | Sense      | 5'-CCGTTGTCAGGCAACGTG-3'                                           |                      |                                |
|                                             |                            |                | WPRE R  | Antisense  | 5'-AGCTGACAGGTGGTGGCAAT-3'                                         |                      |                                |
|                                             |                            |                | WPRE    | Probe      | 5'-FAM-TGCTGACGCAACCCCCACTGGT-TAMRA-3'                             | 84                   | (Lizee et al., 2003)           |

2
